# Supplementary material for: An Ensemble Feature Selection Approach for Analysis and Modeling of Transcriptome Data in Alzheimer’s Disease
Source: MDPI journal article supplement (doi:10.3390/app13042353), 2023-02-11
Supplement: s1 [file s1]

## Supplementary Material

### An ensemble feature selection approach for analysis and modeling of transcriptome data in Alzheimer's Disease

Petros Paplomatas \*, Marios Krokidis \*, Panagiotis Vlamos and Aristidis G. Vrahatis

\*Correspondence: p.paplomatas@hotmail.com, mkrokidis@ionio.gr

**Table S1.** The top 10 enriched biological process for DEGs.

| Index | Name                                                           | p-value  | Adjusted p-value | Odds Ratio | Combined score |
|-------|----------------------------------------------------------------|----------|------------------|------------|----------------|
| 1     | oxidative RNA demethylation (GO:0035513)                       | 0.002997 | 0.07379          | 454.18     | 2638.91        |
| 2     | regulation of core promoter binding (GO:1904796)               | 0.002997 | 0.07379          | 454.18     | 2638.91        |
| 3     | mRNA cleavage (GO:0006379)                                     | 0.002997 | 0.07379          | 454.18     | 2638.91        |
| 4     | glandular epithelial cell development (GO:0002068)             | 0.004193 | 0.07379          | 302.76     | 1657.40        |
| 5     | negative regulation of keratinocyte proliferation (GO:0010839) | 0.004791 | 0.07379          | 259.49     | 1385.98        |
| 6     | DNA dealkylation (GO:0035510)                                  | 0.005985 | 0.07379          | 201.81     | 1032.95        |
| 7     | DNA dealkylation involved in DNA repair (GO:0006307)           | 0.005985 | 0.07379          | 201.81     | 1032.95        |
| 8     | hemidesmosome assembly (GO:0031581)                            | 0.007178 | 0.07379          | 165.10     | 815.05         |
| 9     | cellular response to thyroid hormone stimulus (GO:0097067)     | 0.007178 | 0.07379          | 165.10     | 815.05         |
| 10    | response to thyroid hormone (GO:0097066)                       | 0.007774 | 0.07379          | 151.33     | 735.02         |

**Table S2.** The top 10 enriched molecular function for DEGs.

| Index | Name                                                                   | p-value  | Adjusted p-value | Odds Ratio | Combined score |
|-------|------------------------------------------------------------------------|----------|------------------|------------|----------------|
| 1     | endoribonuclease activity, producing 3'-phosphomonoesters (GO:0016892) | 0.002997 | 0.06173          | 454.18     | 2638.91        |
| 2     | guanylate kinase activity (GO:0004385)                                 | 0.005388 | 0.06173          | 227.05     | 1185.99        |
| 3     | cAMP binding (GO:0030552)                                              | 0.007178 | 0.06173          | 165.10     | 815.05         |
| 4     | R-SMAD binding (GO:0070412)                                            | 0.01134  | 0.06173          | 100.86     | 451.76         |
| 5     | nucleoside monophosphate kinase activity (GO:0050145)                  | 0.01194  | 0.06173          | 95.55      | 423.08         |
| 6     | microtubule plus-end binding (GO:0051010)                              | 0.01194  | 0.06173          | 95.55      | 423.08         |
| 7     | histone acetyltransferase binding (GO:0035035)                         | 0.01253  | 0.06173          | 90.76      | 397.51         |
| 8     | cyclic nucleotide binding (GO:0030551)                                 | 0.01372  | 0.06173          | 82.50      | 353.87         |
| 9     | 2-oxoglutarate-dependent dioxygenase activity (GO:0016706)             | 0.01963  | 0.07851          | 56.69      | 222.85         |

**Table S3.** The top 10 enriched cellular component for DEGs.

| Index | Name                                                  | p-value    | Adjusted p-value | Odds Ratio | Combined score |
|-------|-------------------------------------------------------|------------|------------------|------------|----------------|
| 1     | endolysosome lumen (GO:0036021)                       | 0.002997   | 0.02158          | 454.18     | 2638.91        |
| 2     | hemidesmosome (GO:0030056)                            | 0.004193   | 0.02516          | 302.76     | 1657.40        |
| 3     | platelet dense granule lumen (GO:0031089)             | 0.008370   | 0.04305          | 139.69     | 668.13         |
| 4     | basement membrane (GO:0005604)                        | 0.0004304  | 0.007746         | 79.75      | 618.15         |
| 5     | platelet dense granule (GO:0042827)                   | 0.01253    | 0.05577          | 90.76      | 397.51         |
| 6     | endolysosome (GO:0036019)                             | 0.01490    | 0.05577          | 75.62      | 318.09         |
| 7     | endosome lumen (GO:0031904)                           | 0.01549    | 0.05577          | 72.59      | 302.52         |
| 8     | collagen-containing extracellular matrix (GO:0062023) | 0.00005627 | 0.002026         | 26.08      | 255.20         |
| 9     | ciliary membrane (GO:0060170)                         | 0.01845    | 0.06037          | 60.48      | 241.48         |
| 10    | intermediate filament (GO:0005882)                    | 0.02960    | 0.08880          | 36.99      | 130.21         |

**Table S4.** The top 10 enriched Reactome pathway for DEGs

| Index | Name                                                                                                      | p-value   | Adjusted p-value | Odds Ratio | Combined score |
|-------|-----------------------------------------------------------------------------------------------------------|-----------|------------------|------------|----------------|
| 1     | Reversal Of Alkylation Damage by DNA Dioxygenases R-HSA-73943                                             | 0.004193  | 0.04917          | 302.76     | 1657.40        |
| 2     | RUNX3 Regulates CDKN1A Transcription R-HSA-8941855                                                        | 0.004193  | 0.04917          | 302.76     | 1657.40        |
| 3     | DNA Damage Reversal R-HSA-73942                                                                           | 0.004791  | 0.04917          | 259.49     | 1385.98        |
| 4     | Type I Hemidesmosome Assembly R-HSA-446107                                                                | 0.005388  | 0.04917          | 227.05     | 1185.99        |
| 5     | Trafficking And Processing of Endosomal TLR R-HSA-1679131                                                 | 0.007774  | 0.05675          | 151.33     | 735.02         |
| 6     | Synthesis, Secretion, And Inactivation of Glucose-dependent Insulinotropic Polypeptide (GIP) R-HSA-400511 | 0.007774  | 0.05675          | 151.33     | 735.02         |
| 7     | Rap1 Signaling R-HSA-392517                                                                               | 0.009560  | 0.05725          | 121.05     | 562.89         |
| 8     | Assembly Of Collagen Fibrils and Other Multimeric Structures R-HSA-2022090                                | 0.0005171 | 0.02221          | 72.48      | 548.50         |
| 9     | Syndecan Interactions R-HSA-3000170                                                                       | 0.01194   | 0.05725          | 95.55      | 423.08         |
| 10    | Regulation Of Gene Expression in Beta Cells R-HSA-210745                                                  | 0.01194   | 0.05725          | 95.55      | 423.08         |

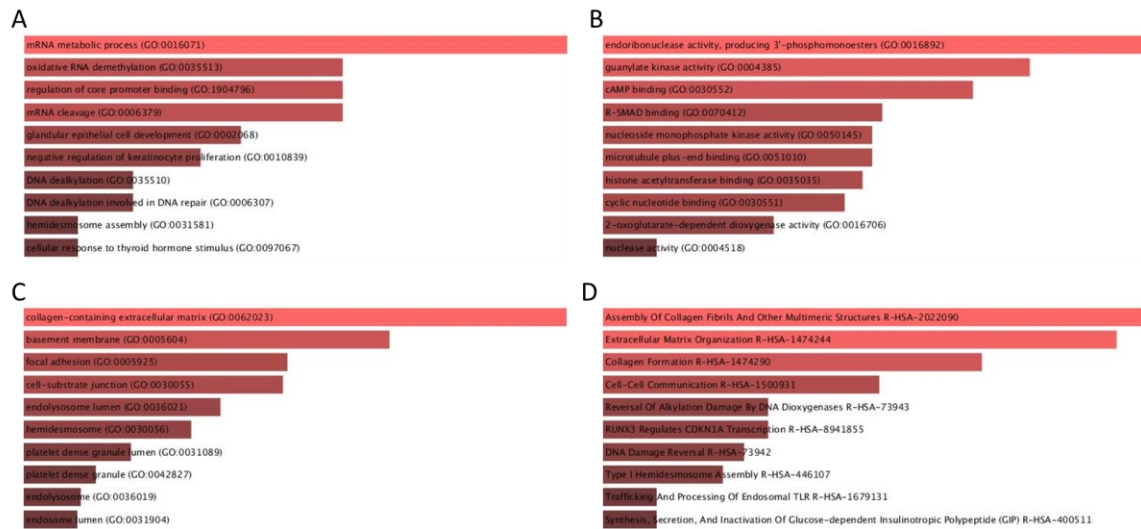

**Figure S1.** GO term and Reactome pathway enrichment analyses performed using Enrichr on DEGs. (A) The top 10 enriched biological process for DEGs. (B) The top 10 enriched molecular function for DEGs. (C) The top 10 enriched cellular component for DEGs. (D) The top 10 enriched Reactome pathway for DEGs.

**Table S5.** The top 10 enriched biological process for Dst

| Index | Name                                              | p-value   | Adjusted p-value | Odds Ratio | Combined score |
|-------|---------------------------------------------------|-----------|------------------|------------|----------------|
| 1     | hemidesmosome assembly (GO:0031581)               | 0.0006000 | 0.004800         | 19988.00   | 148283.12      |
| 2     | retrograde axonal transport (GO:0008090)          | 0.0008000 | 0.004800         | 19984.00   | 142504.37      |
| 3     | cell-substrate junction assembly (GO:0007044)     | 0.001700  | 0.005400         | 19966.00   | 127326.11      |
| 4     | axonal transport (GO:0098930)                     | 0.001800  | 0.005400         | 19964.00   | 126172.23      |
| 5     | cytoplasmic microtubule organization (GO:0031122) | 0.002700  | 0.006428         | 19946.00   | 117971.02      |
| 6     | wound healing (GO:0042060)                        | 0.003500  | 0.006428         | 19930.00   | 112704.30      |
| 7     | integrin-mediated signaling pathway (GO:0007229)  | 0.003750  | 0.006428         | 19925.00   | 111301.34      |
| 8     | collagen fibril organization (GO:0030199)         | 0.004450  | 0.006675         | 19911.00   | 107815.38      |
| 9     | cytoskeleton organization (GO:0007010)            | 0.006000  | 0.008000         | 19880.00   | 101706.24      |
| 10    | extracellular matrix organization (GO:0030198)    | 0.01500   | 0.01800          | 19700.00   | 82734.36       |

**Table S6.** The top 3 enriched molecular function for Dst.

| Index | Name                                      | p-value  | Adjusted p-value | Odds Ratio | Combined score |
|-------|-------------------------------------------|----------|------------------|------------|----------------|
| 1     | microtubule plus-end binding (GO:0051010) | 0.001000 | 0.003000         | 19980.00   | 138017.41      |
| 2     | microtubule binding (GO:0008017)          | 0.01160  | 0.01535          | 19768.00   | 88101.22       |
| 3     | tubulin binding (GO:0015631)              | 0.01535  | 0.01535          | 19693.00   | 82250.73       |

**Table S7.** The top 10 enriched cellular component for Dst

| Index | Name                                                  | p-value   | Adjusted p-value | Odds Ratio | Combined score |
|-------|-------------------------------------------------------|-----------|------------------|------------|----------------|
| 1     | hemidesmosome (GO:0030056)                            | 0.0003500 | 0.004200         | 19993.00   | 159096.45      |
| 2     | intermediate filament (GO:0005882)                    | 0.002500  | 0.01040          | 19950.00   | 119530.06      |
| 3     | basement membrane (GO:0005604)                        | 0.002600  | 0.01040          | 19948.00   | 118735.70      |
| 4     | intermediate filament cytoskeleton (GO:0045111)       | 0.004200  | 0.01260          | 19916.00   | 108994.00      |
| 5     | polymeric cytoskeletal fiber (GO:0099513)             | 0.01280   | 0.02627          | 19744.00   | 86050.65       |
| 6     | microtubule cytoskeleton (GO:0015630)                 | 0.01655   | 0.02627          | 19669.00   | 80669.99       |
| 7     | collagen-containing extracellular matrix (GO:0062023) | 0.01900   | 0.02627          | 19620.00   | 77760.41       |
| 8     | focal adhesion (GO:0005925)                           | 0.01935   | 0.02627          | 19613.00   | 77374.66       |
| 9     | cell-substrate junction (GO:0030055)                  | 0.01970   | 0.02627          | 19606.00   | 76995.59       |
| 10    | cytoskeleton (GO:0005856)                             | 0.03000   | 0.03600          | 19400.00   | 68027.34       |

**Table S8.** The top 10 enriched Reactome pathway for Dst

| Index | Name                                                                       | p-value   | Adjusted p-value | Odds Ratio | Combined score |
|-------|----------------------------------------------------------------------------|-----------|------------------|------------|----------------|
| 1     | Type I Hemidesmosome Assembly R-HSA-446107                                 | 0.0004500 | 0.005375         | 19991.00   | 154056.47      |
| 2     | RHOV GTPase Cycle R-HSA-9013424                                            | 0.001850  | 0.005375         | 19963.00   | 125618.94      |
| 3     | RHOU GTPase Cycle R-HSA-9013420                                            | 0.001950  | 0.005375         | 19961.00   | 124555.53      |
| 4     | RND3 GTPase Cycle R-HSA-9696264                                            | 0.002100  | 0.005375         | 19958.00   | 123057.76      |
| 5     | RND1 GTPase Cycle R-HSA-9696273                                            | 0.002100  | 0.005375         | 19958.00   | 123057.76      |
| 6     | RND2 GTPase Cycle R-HSA-9696270                                            | 0.002150  | 0.005375         | 19957.00   | 122581.99      |
| 7     | Assembly Of Collagen Fibrils and Other Multimeric Structures R-HSA-2022090 | 0.002850  | 0.006107         | 19943.00   | 116875.01      |
| 8     | Cell Junction Organization R-HSA-446728                                    | 0.004300  | 0.007500         | 19914.00   | 108514.46      |
| 9     | Collagen Formation R-HSA-1474290                                           | 0.004500  | 0.007500         | 19910.00   | 107587.50      |
| 10    | Cell-Cell Communication R-HSA-1500931                                      | 0.006000  | 0.009000         | 19880.00   | 101706.24      |

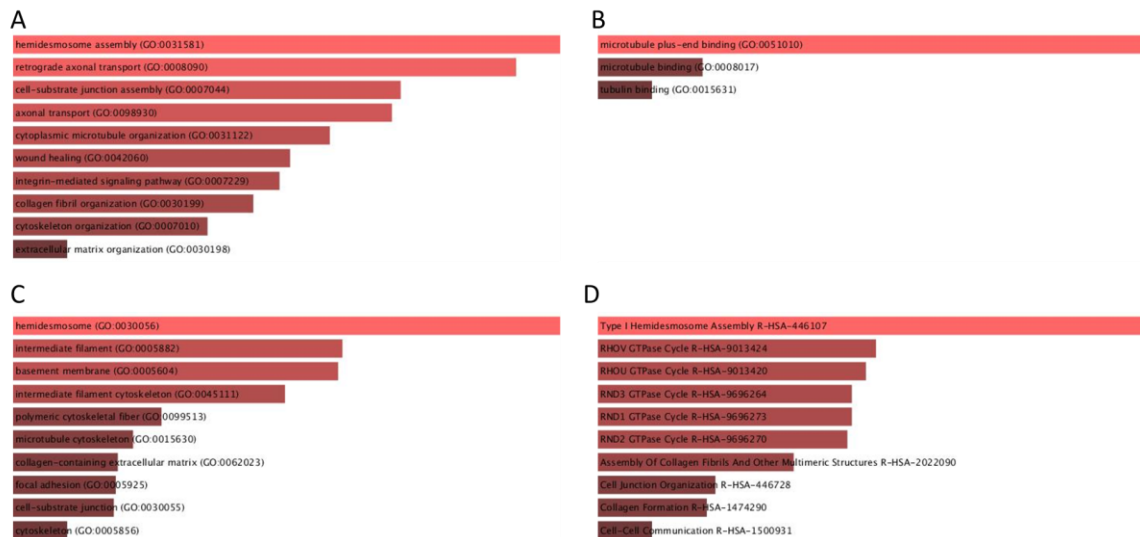

**Figure S2.** GO term and Reactome pathway enrichment analyses performed using Enrichr on Dst. (A) The top 10 enriched biological process. (B) The top 3 enriched molecular function. (C) The top 10 enriched cellular component. (D) The top 10 enriched Reactome pathway.

**Table S9.** The top 3 enriched biological process for *Rapgef4*

| Index | Name                                                 | p-value  | Adjusted p-value | Odds Ratio | Combined score |
|-------|------------------------------------------------------|----------|------------------|------------|----------------|
| 1     | regulation of peptide hormone secretion (GO:0090276) | 0.003700 | 0.006250         | 19926.00   | 111574.39      |
| 2     | regulation of insulin secretion (GO:0050796)         | 0.005200 | 0.006250         | 19896.00   | 104635.25      |
| 3     | regulation of protein secretion (GO:0050708)         | 0.006250 | 0.006250         | 19875.00   | 100869.32      |

**Table S10.** The top 7 enriched molecular function for *Rapgef4*

| Index | Name                                                    | p-value   | Adjusted p-value | Odds Ratio | Combined score |
|-------|---------------------------------------------------------|-----------|------------------|------------|----------------|
| 1     | cAMP binding (GO:0030552)                               | 0.0006000 | 0.004025         | 19988.00   | 148283.12      |
| 2     | cyclic nucleotide binding (GO:0030551)                  | 0.001150  | 0.004025         | 19977.00   | 135204.64      |
| 3     | guanyl-nucleotide exchange factor activity (GO:0005085) | 0.007450  | 0.01407          | 19851.00   | 97261.02       |
| 4     | small GTPase binding (GO:0031267)                       | 0.008750  | 0.01407          | 19825.00   | 93944.97       |
| 5     | GTPase binding (GO:0051020)                             | 0.01005   | 0.01407          | 19799.00   | 91079.22       |
| 6     | adenyl ribonucleotide binding (GO:0032559)              | 0.01530   | 0.01680          | 19694.00   | 82319.16       |
| 7     | GTPase activator activity (GO:0005096)                  | 0.01680   | 0.01680          | 19664.00   | 80354.66       |

**Table S11.** The top 10 enriched Reactome pathway for *Rapgef4*

| Index | Name                                                                    | p-value   | Adjusted p-value | Odds Ratio | Combined score |
|-------|-------------------------------------------------------------------------|-----------|------------------|------------|----------------|
| 1     | Rap1 Signaling R-HSA-392517                                             | 0.0008000 | 0.006300         | 19984.00   | 142504.37      |
| 2     | Integrin Signaling R-HSA-354192                                         | 0.001350  | 0.006300         | 19973.00   | 131975.02      |
| 3     | Platelet Aggregation (Plug Formation) R-HSA-76009                       | 0.001800  | 0.006300         | 19964.00   | 126172.23      |
| 4     | Glucagon-like Peptide-1 (GLP1) Regulates Insulin Secretion R-HSA-381676 | 0.002100  | 0.006300         | 19958.00   | 123057.76      |
| 5     | Regulation Of Insulin Secretion R-HSA-422356                            | 0.003850  | 0.009240         | 19923.00   | 110765.84      |
| 6     | Integration Of Energy Metabolism R-HSA-163685                           | 0.005250  | 0.01050          | 19895.00   | 104439.61      |
| 7     | Platelet Activation, Signaling and Aggregation R-HSA-76002              | 0.01270   | 0.02177          | 19746.00   | 86214.24       |
| 8     | Hemostasis R-HSA-109582                                                 | 0.02880   | 0.04320          | 19424.00   | 68904.42       |
| 9     | Adaptive Immune System R-HSA-1280218                                    | 0.03665   | 0.04887          | 19267.00   | 63703.39       |
| 10    | Immune System R-HSA-168256                                              | 0.09715   | 0.1118           | 18057.00   | 42099.93       |

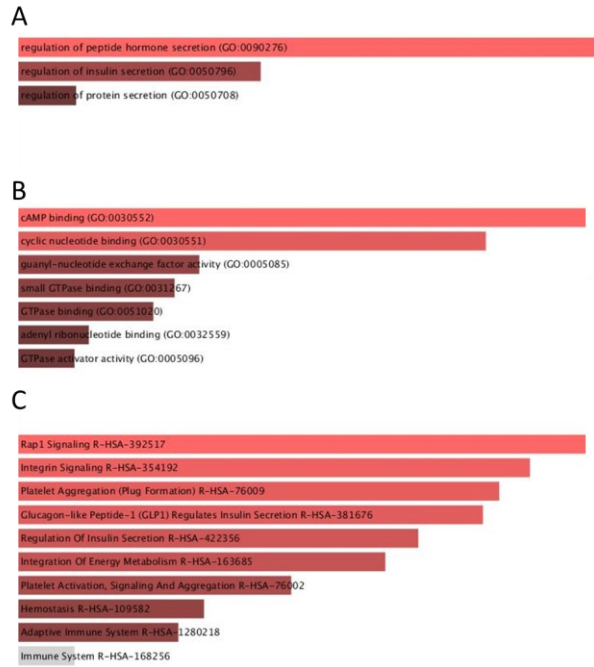

**Figure S3.** GO term and Reactome pathway enrichment analyses performed using Enrichr on *Rapgef4*. A) The top 3 enriched biological process. (B) The top 7 enriched molecular function. (C) The top 10 enriched Reactome pathway.

**Table S12.** The top 10 enriched biological process for *Pax6*

| Index | Name                                                                            | p-value   | Adjusted p-value | Odds Ratio | Combined score |
|-------|---------------------------------------------------------------------------------|-----------|------------------|------------|----------------|
| 1     | regulation of core promoter binding (GO:1904796)                                | 0.0002500 | 0.004900         | 19995.00   | 165840.18      |
| 2     | glandular epithelial cell development (GO:0002068)                              | 0.0003500 | 0.004900         | 19993.00   | 159096.45      |
| 3     | neuron fate commitment (GO:0048663)                                             | 0.0007000 | 0.005880         | 19986.00   | 145187.41      |
| 4     | negative regulation of nervous system development (GO:0051961)                  | 0.0009500 | 0.005880         | 19981.00   | 139049.21      |
| 5     | positive regulation of transcription regulatory region DNA binding (GO:2000679) | 0.001050  | 0.005880         | 19979.00   | 137035.71      |
| 6     | negative regulation of cell development (GO:0010721)                            | 0.001300  | 0.006067         | 19974.00   | 132735.46      |
| 7     | negative regulation of neurogenesis (GO:0050768)                                | 0.001750  | 0.007000         | 19965.00   | 126740.99      |
| 8     | visual system development (GO:0150063)                                          | 0.002050  | 0.007175         | 19959.00   | 123544.89      |
| 9     | sensory organ development (GO:0007423)                                          | 0.002800  | 0.007891         | 19944.00   | 117233.87      |
| 10    | eye development (GO:0001654)                                                    | 0.002900  | 0.007891         | 19942.00   | 116522.32      |

**Table S13.** The top 10 enriched molecular function for *Pax6*

| Index | Name                                                              | p-value   | Adjusted p-value | Odds Ratio | Combined score |
|-------|-------------------------------------------------------------------|-----------|------------------|------------|----------------|
| 1     | R-SMAD binding (GO:0070412)                                       | 0.0009500 | 0.006825         | 19981.00   | 139049.21      |
| 2     | histone acetyltransferase binding (GO:0035035)                    | 0.001050  | 0.006825         | 19979.00   | 137035.71      |
| 3     | transcription regulatory region nucleic acid binding (GO:0001067) | 0.01060   | 0.04593          | 19788.00   | 89974.28       |
| 4     | kinase binding (GO:0019900)                                       | 0.02305   | 0.05142          | 19539.00   | 73663.91       |
| 5     | protein kinase binding (GO:0019901)                               | 0.02530   | 0.05142          | 19494.00   | 71678.61       |
| 6     | transcription cis-regulatory region binding (GO:0000976)          | 0.02745   | 0.05142          | 19451.00   | 69934.03       |
| 7     | double-stranded DNA binding (GO:0003690)                          | 0.03255   | 0.05142          | 19349.00   | 66270.01       |
| 8     | sequence-specific DNA binding (GO:0043565)                        | 0.03535   | 0.05142          | 19293.00   | 64486.12       |
| 9     | sequence-specific double-stranded DNA binding (GO:1990837)        | 0.03560   | 0.05142          | 19288.00   | 64333.48       |
| 10    | DNA binding (GO:0003677)                                          | 0.04055   | 0.05271          | 19189.00   | 61505.05       |



**Table S14.** The top 10 enriched Reactome pathway for *Pax6*

| Index | Name                                                                                                      | p-value   | Adjusted p-value | Odds Ratio | Combined score |
|-------|-----------------------------------------------------------------------------------------------------------|-----------|------------------|------------|----------------|
| 1     | Synthesis, Secretion, And Inactivation of Glucose-dependent Insulinotropic Polypeptide (GIP) R-HSA-400511 | 0.0006500 | 0.002700         | 19987.00   | 146675.88      |
| 2     | Regulation Of Gene Expression in Beta Cells R-HSA-210745                                                  | 0.001000  | 0.002700         | 19980.00   | 138017.41      |
| 3     | Synthesis, Secretion, And Inactivation of Glucagon-like Peptide-1 (GLP-1) R-HSA-381771                    | 0.001050  | 0.002700         | 19979.00   | 137035.71      |
| 4     | Incretin Synthesis, Secretion, And Inactivation R-HSA-400508                                              | 0.001200  | 0.002700         | 19976.00   | 134347.69      |
| 5     | Regulation Of Beta-Cell Development R-HSA-186712                                                          | 0.002050  | 0.003690         | 19959.00   | 123544.89      |
| 6     | Peptide Hormone Metabolism R-HSA-2980736                                                                  | 0.004450  | 0.005850         | 19911.00   | 107815.38      |
| 7     | Activation Of HOX Genes During Differentiation R-HSA-5619507                                              | 0.004550  | 0.005850         | 19909.00   | 107362.11      |
| 8     | Developmental Biology R-HSA-1266738                                                                       | 0.05365   | 0.06036          | 18927.00   | 55366.73       |
| 9     | Metabolism Of Proteins R-HSA-392499                                                                       | 0.09450   | 0.09450          | 18110.00   | 42724.35       |

**A**

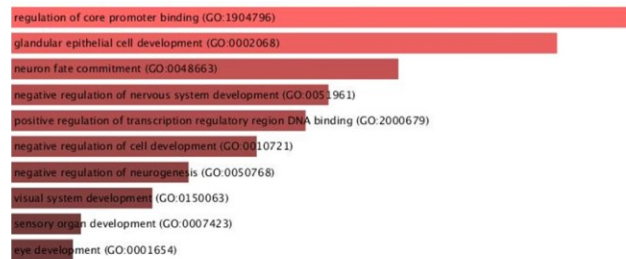

**B**

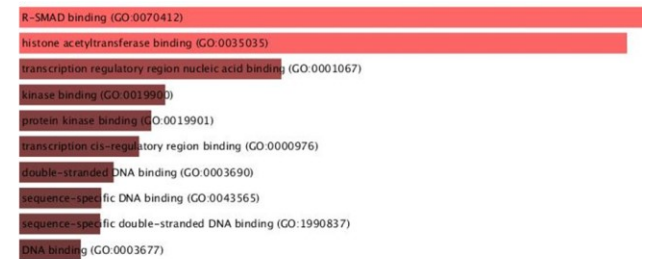

**C**

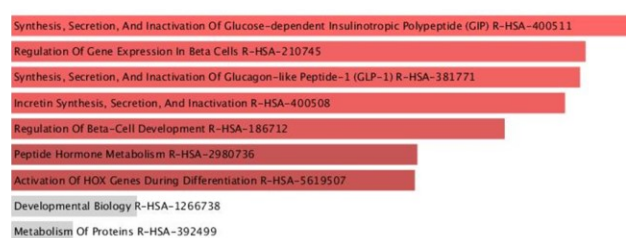

**Figure S4.** GO term and Reactome pathway enrichment analyses performed using Enrichr on *Pax6*. A) The top 10 enriched biological process. (B) The top 10 enriched molecular function. (C) The top 10 enriched Reactome pathway.

**Table S15.** The top 10 enriched biological process for *Cask*.

| Index | Name                                                                   | p-value   | Adjusted p-value | Odds Ratio | Combined score |
|-------|------------------------------------------------------------------------|-----------|------------------|------------|----------------|
| 1     | negative regulation of keratinocyte proliferation (GO:0010839)         | 0.0004000 | 0.004000         | 19992.00   | 156418.91      |
| 2     | regulation of cellular response to growth factor stimulus (GO:0090287) | 0.0008500 | 0.004000         | 19983.00   | 141285.77      |
| 3     | negative regulation of response to wounding (GO:1903035)               | 0.001050  | 0.004000         | 19979.00   | 137035.71      |
| 4     | regulation of keratinocyte proliferation (GO:0010837)                  | 0.001200  | 0.004000         | 19976.00   | 134347.69      |
| 5     | negative regulation of wound healing (GO:0061045)                      | 0.001450  | 0.004000         | 19971.00   | 130534.69      |
| 6     | negative regulation of cell-matrix adhesion (GO:0001953)               | 0.001600  | 0.004000         | 19968.00   | 128549.42      |
| 7     | negative regulation of cell-substrate adhesion (GO:0010812)            | 0.002000  | 0.004286         | 19960.00   | 124043.95      |
| 8     | regulation of wound healing (GO:0061041)                               | 0.002350  | 0.004406         | 19953.00   | 120782.64      |
| 9     | negative regulation of response to stimulus (GO:0048585)               | 0.003050  | 0.004562         | 19939.00   | 115499.24      |
| 10    | regulation of cell-matrix adhesion (GO:0001952)                        | 0.003250  | 0.004562         | 19935.00   | 114209.93      |

**Table S16.** The top 10 enriched molecular function for *Cask*

| Index | Name                                                  | p-value   | Adjusted p-value | Odds Ratio | Combined score |
|-------|-------------------------------------------------------|-----------|------------------|------------|----------------|
| 1     | guanylate kinase activity (GO:0004385)                | 0.0004500 | 0.001350         | 19991.00   | 154056.47      |
| 2     | nucleoside monophosphate kinase activity (GO:0050145) | 0.001000  | 0.001500         | 19980.00   | 138017.41      |
| 3     | protein serine/threonine kinase activity (GO:0004674) | 0.01720   | 0.01720          | 19656.00   | 79859.45       |

**Table S17.** The top 10 enriched cellular component for *Cask*

| Index | Name                                                  | p-value  | Adjusted p-value | Odds Ratio | Combined score |
|-------|-------------------------------------------------------|----------|------------------|------------|----------------|
| 1     | ciliary membrane (GO:0060170)                         | 0.001550 | 0.01820          | 19969.00   | 129189.85      |
| 2     | basement membrane (GO:0005604)                        | 0.002600 | 0.01820          | 19948.00   | 118735.70      |
| 3     | cell projection membrane (GO:0031253)                 | 0.004600 | 0.02147          | 19908.00   | 107139.14      |
| 4     | cilium (GO:0005929)                                   | 0.01185  | 0.03064          | 19763.00   | 87657.54       |
| 5     | cell-cell junction (GO:0005911)                       | 0.01355  | 0.03064          | 19729.00   | 84861.88       |
| 6     | actin cytoskeleton (GO:0015629)                       | 0.01580  | 0.03064          | 19684.00   | 81644.38       |
| 7     | collagen-containing extracellular matrix (GO:0062023) | 0.01900  | 0.03064          | 19620.00   | 77760.41       |
| 8     | focal adhesion (GO:0005925)                           | 0.01935  | 0.03064          | 19613.00   | 77374.66       |
| 9     | cell-substrate junction (GO:0030055)                  | 0.01970  | 0.03064          | 19606.00   | 76995.59       |
| 10    | cytoskeleton (GO:0005856)                             | 0.03000  | 0.04130          | 19400.00   | 68027.34       |

**Table S18.** The top 10 enriched Reactome pathway for *Cask*

| Index | Name                                                                     | p-value  | Adjusted p-value | Odds Ratio | Combined score |
|-------|--------------------------------------------------------------------------|----------|------------------|------------|----------------|
| 1     | Syndecan Interactions R-HSA-3000170                                      | 0.001000 | 0.005625         | 19980.00   | 138017.41      |
| 2     | Nephrin Family Interactions R-HSA-373753                                 | 0.001100 | 0.005625         | 19978.00   | 136099.47      |
| 3     | Dopamine Neurotransmitter Release Cycle R-HSA-212676                     | 0.001150 | 0.005625         | 19977.00   | 135204.64      |
| 4     | Assembly and Cell Surface Presentation of NMDA Receptors R-HSA-9609736   | 0.001250 | 0.005625         | 19975.00   | 133525.54      |
| 5     | Non-integrin membrane-ECM Interactions R-HSA-3000171                     | 0.002050 | 0.006136         | 19959.00   | 123544.89      |
| 6     | Neurotransmitter Release Cycle R-HSA-112310                              | 0.002500 | 0.006136         | 19950.00   | 119530.06      |
| 7     | Sensory Processing of Sound by Outer Hair Cells of Cochlea R-HSA-9662361 | 0.002650 | 0.006136         | 19947.00   | 118349.79      |
| 8     | Neurexins And Neuroligins R-HSA-6794361                                  | 0.002850 | 0.006136         | 19943.00   | 116875.01      |
| 9     | Sensory Processing of Sound by Inner Hair Cells of Cochlea R-HSA-9662360 | 0.003350 | 0.006136         | 19933.00   | 113594.39      |
| 10    | Activation Of NMDA Receptors and Postsynaptic Events R-HSA-442755        | 0.003700 | 0.006136         | 19926.00   | 111574.39      |

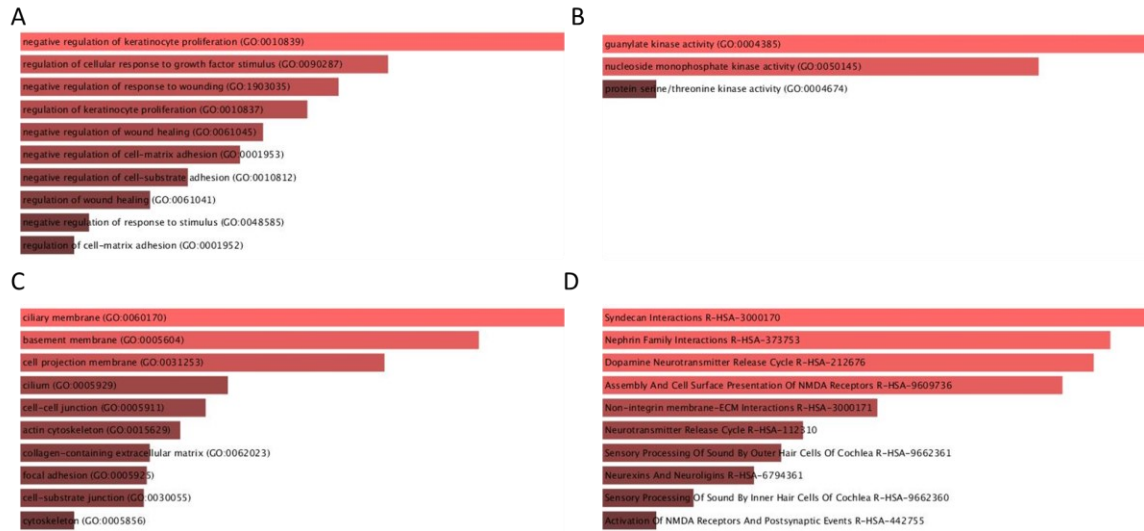

**Figure S5.** GO term and Reactome pathway enrichment analyses performed using Enrichr on *Cask*. (A) The top 10 enriched biological process. (B) The top 10 enriched molecular function. (C) The top 10 enriched cellular component. (D) The top 10 enriched Reactome pathway.

**Table S19.** The top 10 enriched biological process for *Ctsb*

| Index | Name                                                                    | p-value   | Adjusted p-value | Odds Ratio | Combined score |
|-------|-------------------------------------------------------------------------|-----------|------------------|------------|----------------|
| 1     | cellular response to thyroid hormone stimulus (GO:0097067)              | 0.0006000 | 0.004875         | 19988.00   | 148283.12      |
| 2     | response to thyroid hormone (GO:0097066)                                | 0.0006500 | 0.004875         | 19987.00   | 146675.88      |
| 3     | cellular protein catabolic process (GO:0044257)                         | 0.003000  | 0.009469         | 19940.00   | 115834.63      |
| 4     | pattern recognition receptor signaling pathway (GO:0002221)             | 0.003050  | 0.009469         | 19939.00   | 115499.24      |
| 5     | proteolysis involved in cellular protein catabolic process (GO:0051603) | 0.003700  | 0.009469         | 19926.00   | 111574.39      |
| 6     | cellular response to hormone stimulus (GO:0032870)                      | 0.003800  | 0.009469         | 19924.00   | 111031.85      |
| 7     | toll-like receptor signaling pathway (GO:0002224)                       | 0.004550  | 0.009469         | 19909.00   | 107362.11      |
| 8     | epithelial cell differentiation (GO:0030855)                            | 0.005050  | 0.009469         | 19899.00   | 105233.48      |
| 9     | epithelium development (GO:0060429)                                     | 0.006100  | 0.01017          | 19878.00   | 101367.44      |
| 10    | regulation of programmed cell death (GO:0043067)                        | 0.009700  | 0.01455          | 19806.00   | 91813.48       |

**Table S20.** The top 3 enriched molecular function for *Ctsb*

| Index | Name                                              | p-value  | Adjusted p-value | Odds Ratio | Combined score |
|-------|---------------------------------------------------|----------|------------------|------------|----------------|
| 1     | cysteine-type peptidase activity (GO:0008234)     | 0.004900 | 0.007875         | 19902.00   | 105849.45      |
| 2     | cysteine-type endopeptidase activity (GO:0004197) | 0.005250 | 0.007875         | 19895.00   | 104439.61      |
| 3     | endopeptidase activity (GO:0004175)               | 0.01575  | 0.01575          | 19685.00   | 81710.92       |

**Table S21.** The top 10 enriched cellular component for *Ctsb*

| Index | Name                                                  | p-value   | Adjusted p-value | Odds Ratio | Combined score |
|-------|-------------------------------------------------------|-----------|------------------|------------|----------------|
| 1     | endolysosome lumen (GO:0036021)                       | 0.0002500 | 0.002500         | 19995.00   | 165840.18      |
| 2     | endolysosome (GO:0036019)                             | 0.001250  | 0.004333         | 19975.00   | 133525.54      |
| 3     | endosome lumen (GO:0031904)                           | 0.001300  | 0.004333         | 19974.00   | 132735.46      |
| 4     | lysosomal lumen (GO:0043202)                          | 0.004300  | 0.01075          | 19914.00   | 108514.46      |
| 5     | ficolin-1-rich granule lumen (GO:1904813)             | 0.006150  | 0.01230          | 19877.00   | 101200.08      |
| 6     | ficolin-1-rich granule (GO:0101002)                   | 0.009200  | 0.01533          | 19816.00   | 92908.55       |
| 7     | lytic vacuole (GO:0000323)                            | 0.01095   | 0.01564          | 19781.00   | 89299.85       |
| 8     | collagen-containing extracellular matrix (GO:0062023) | 0.01900   | 0.02375          | 19620.00   | 77760.41       |
| 9     | lysosome (GO:0005764)                                 | 0.02385   | 0.02650          | 19523.00   | 72937.49       |
| 10    | intracellular organelle lumen (GO:0070013)            | 0.04240   | 0.04240          | 19152.00   | 60532.03       |

**Table S22.** The top 10 enriched Reactome pathway for *Ctsb*

| Index | Name                                                                       | p-value   | Adjusted p-value | Odds Ratio | Combined score |
|-------|----------------------------------------------------------------------------|-----------|------------------|------------|----------------|
| 1     | Trafficking And Processing of Endosomal TLR R-HSA-1679131                  | 0.0006500 | 0.007800         | 19987.00   | 146675.88      |
| 2     | Collagen Degradation R-HSA-1442490                                         | 0.002000  | 0.01090          | 19960.00   | 124043.95      |
| 3     | Assembly Of Collagen Fibrils and Other Multimeric Structures R-HSA-2022090 | 0.002850  | 0.01090          | 19943.00   | 116875.01      |
| 4     | Collagen Formation R-HSA-1474290                                           | 0.004500  | 0.01090          | 19910.00   | 107587.50      |
| 5     | MHC Class II Antigen Presentation R-HSA-2132295                            | 0.005200  | 0.01090          | 19896.00   | 104635.25      |
| 6     | Degradation Of Extracellular Matrix R-HSA-1474228                          | 0.005450  | 0.01090          | 19891.00   | 103674.93      |
| 7     | Toll-like Receptor Cascades R-HSA-168898                                   | 0.008100  | 0.01389          | 19838.00   | 95537.87       |

| Index | Name                                            | p-value | Adjusted p-value | Odds Ratio | Combined score |
|-------|-------------------------------------------------|---------|------------------|------------|----------------|
| 8     | Extracellular Matrix Organization R-HSA-1474244 | 0.01455 | 0.02182          | 19709.00   | 83372.48       |
| 9     | Neutrophil Degranulation R-HSA-6798695          | 0.02340 | 0.03120          | 19532.00   | 73343.17       |
| 10    | Adaptive Immune System R-HSA-1280218            | 0.03665 | 0.04398          | 19267.00   | 63703.39       |

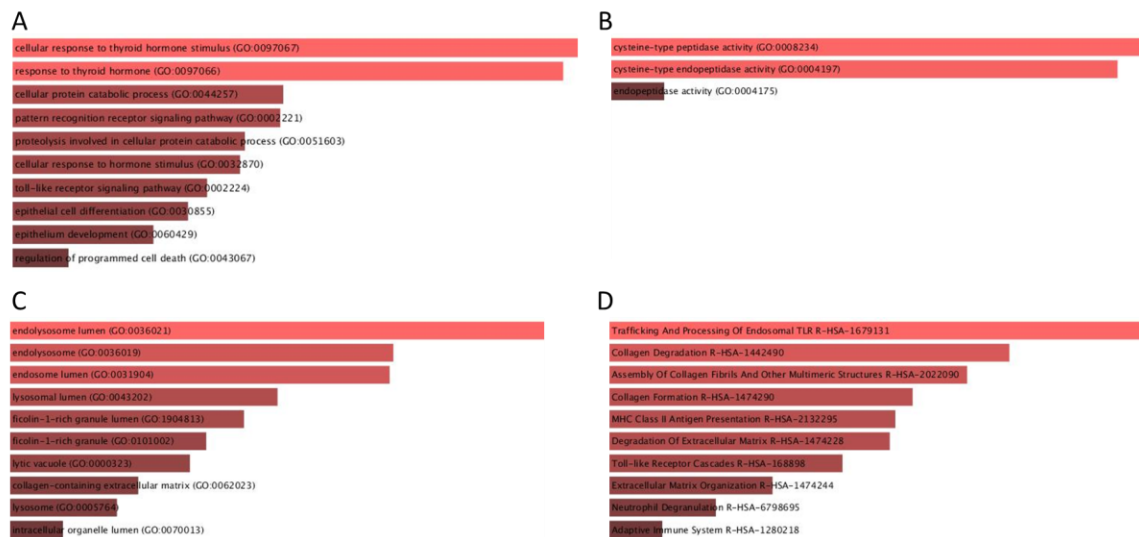

Figure S6. GO term and Reactome pathway enrichment analyses performed using Enrichr on *Ctsb*. (A) The top 10 enriched biological process. (B) The top 10 enriched molecular function. (C) The top 10 enriched cellular component. (D) The top 10 enriched Reactome pathway.

**Table S23.** The top 10 enriched biological process for *ZFHX3*

| Index | Name                                                                     | p-value  | Adjusted p-value | Odds Ratio | Combined score |
|-------|--------------------------------------------------------------------------|----------|------------------|------------|----------------|
| 1     | regulation of neuron differentiation (GO:0045664)                        | 0.003950 | 0.02652          | 19921.00   | 110243.90      |
| 2     | positive regulation of cell adhesion (GO:0045785)                        | 0.004000 | 0.02652          | 19920.00   | 109987.79      |
| 3     | regulation of cell adhesion (GO:0030155)                                 | 0.006650 | 0.02652          | 19867.00   | 99596.26       |
| 4     | brain development (GO:0007420)                                           | 0.007500 | 0.02652          | 19850.00   | 97123.34       |
| 5     | regulation of cell differentiation (GO:0045595)                          | 0.007800 | 0.02652          | 19844.00   | 96315.69       |
| 6     | central nervous system development (GO:0007417)                          | 0.01340  | 0.03797          | 19732.00   | 85094.44       |
| 7     | regulation of nucleic acid-templated transcription (GO:1903506)          | 0.02150  | 0.04826          | 19570.00   | 75143.11       |
| 8     | regulation of cellular macromolecule biosynthetic process (GO:2000112)   | 0.02340  | 0.04826          | 19532.00   | 73343.17       |
| 9     | positive regulation of nucleic acid-templated transcription (GO:1903508) | 0.02555  | 0.04826          | 19489.00   | 71468.59       |
| 10    | positive regulation of cellular process (GO:0048522)                     | 0.03125  | 0.05285          | 19375.00   | 67148.74       |

**Table S24.** The top enriched molecular function for *ZFHX3*.

| Index | Name                                                                                         | p-value | Adjusted p-value | Odds Ratio | Combined score |
|-------|----------------------------------------------------------------------------------------------|---------|------------------|------------|----------------|
| 1     | DNA-binding transcription repressor activity, RNA polymerase II-specific (GO:0001227)        | 0.01280 | 0.05120          | 19744.00   | 86050.65       |
| 2     | RNA polymerase II cis-regulatory region sequence-specific DNA binding (GO:0000978)           | 0.05745 | 0.06795          | 18851.00   | 53854.37       |
| 3     | cis-regulatory region sequence-specific DNA binding (GO:0000987)                             | 0.05745 | 0.06795          | 18851.00   | 53854.37       |
| 4     | RNA polymerase II transcription regulatory region sequence-specific DNA binding (GO:0000977) | 0.06795 | 0.06795          | 18641.00   | 50125.40       |

**Table S25.** The top enriched cellular component for *ZFHX3*

| Index | Name                                                  | p-value | Adjusted p-value | Odds Ratio | Combined score |
|-------|-------------------------------------------------------|---------|------------------|------------|----------------|
| 1     | nucleus (GO:0005634)                                  | 0.2242  | 0.2596           | 15516.00   | 23199.80       |
| 2     | intracellular membrane-bounded organelle (GO:0043231) | 0.2596  | 0.2596           | 14808.00   | 19970.28       |

**Table S26.** The top enriched Reactome pathway for DEGs

| Index | Name                                               | p-value   | Adjusted p-value | Odds Ratio | Combined score |
|-------|----------------------------------------------------|-----------|------------------|------------|----------------|
| 1     | RUNX3 Regulates CDKN1A Transcription R-HSA-8941855 | 0.0003500 | 0.001750         | 19993.00   | 159096.45      |
| 2     | Transcriptional Regulation By RUNX3 R-HSA-8878159  | 0.004750  | 0.01187          | 19905.00   | 106484.27      |
| 3     | Generic Transcription Pathway R-HSA-212436         | 0.05950   | 0.07245          | 18810.00   | 53077.73       |
| 4     | RNA Polymerase II Transcription R-HSA-73857        | 0.06560   | 0.07245          | 18688.00   | 50909.53       |
| 5     | Gene Expression (Transcription) R-HSA-74160        | 0.07245   | 0.07245          | 18551.00   | 48693.8        |

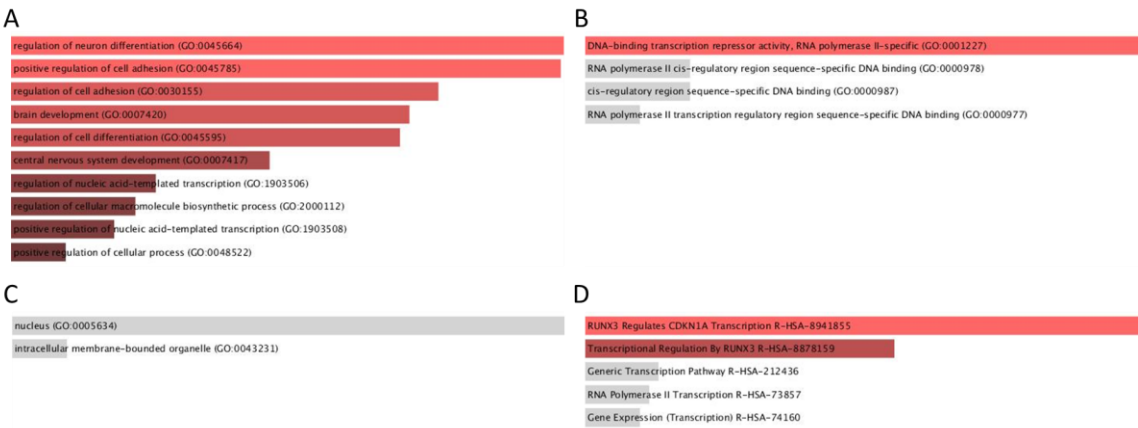

**Figure S7.** GO term and Reactome pathway enrichment analyses performed using Enrichr on ZFH3. (A) The top 10 enriched biological process. (B) The top enriched molecular function. (C) The top enriched cellular component. (D) The top enriched Reactome pathway.





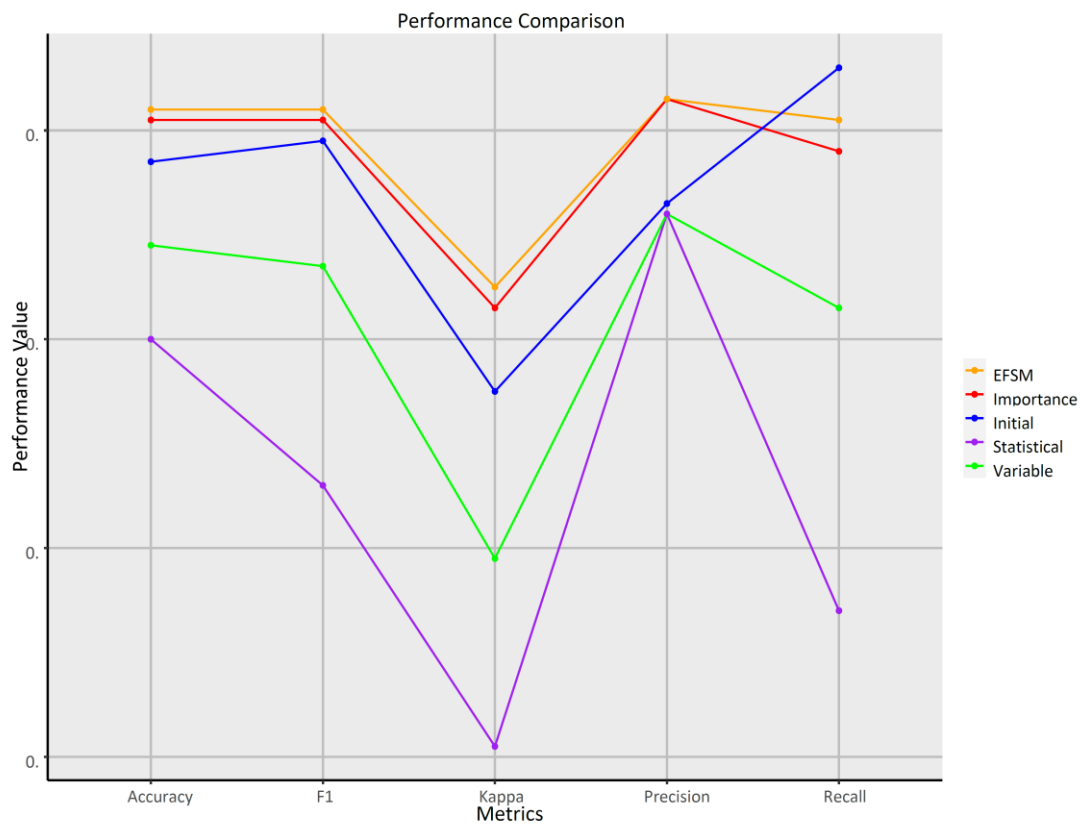

**Figure S9.** The results of a k-nearest neighbors (kNN) model. The x-axis labeled as "Metrics" and the y-axis labeled as "Performance Value". The different metrics being plotted include accuracy, F1 score, Kappa, Precision, and Recall. The plot utilizes different colors to differentiate between the various methods, with the intention of highlighting the superior performance of the EFSM method.

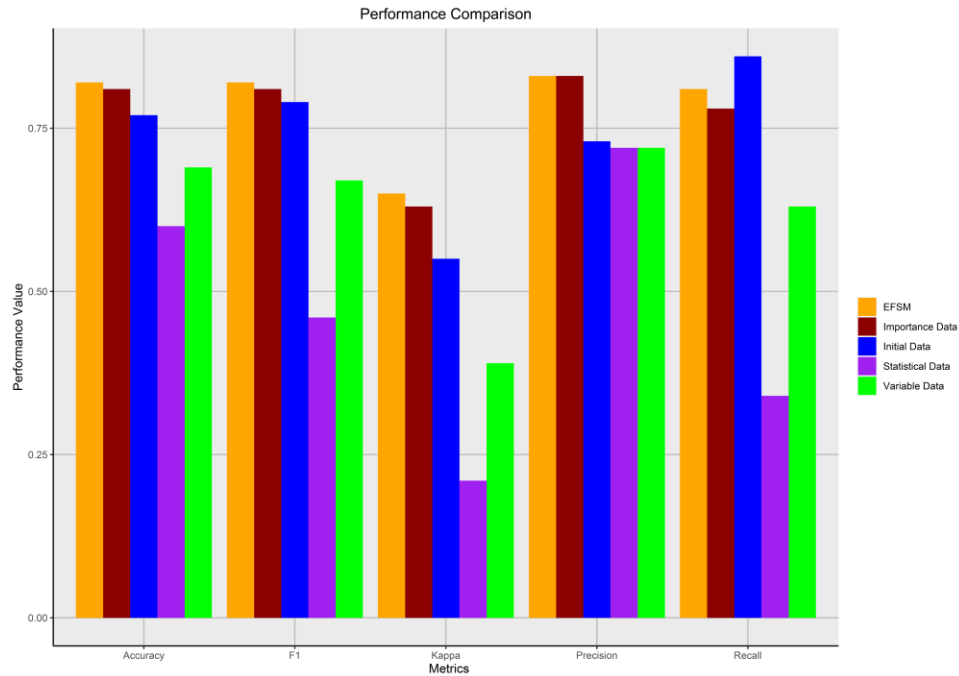

**Figure S10.** Performance of various methods in terms of accuracy, F1 score, Kappa, Precision, and Recall. The different colors represent different methods, allowing us to compare their performance side by side. The x-axis displays the different metrics, providing a clear visual representation of the effectiveness of each method. The y-axis shows the values of the metrics, with the highest values at the top.
